# Supplementary material for: Generation of a Mouse Model with Down-Regulated U50 snoRNA (SNORD50) Expression and Its Organ-Specific Phenotypic Modulation
Source: PubMed Central journal article supplement (PMC3753356; doi:10.1371/journal.pone.0072105), 2013-08-26
Supplement: pone.0072105.s002.pdf [file pone.0072105.s002.pdf]

↗ Intron 3
↗ mU50  
**WT** gtgagtgggtgctctgttttgttttctgctgagcttactgtcggttgggtctag **TCTATGATGATCCTATCCC**  
 \*\*\*\*\*  
**ΔmU50** gtgagtgggtgctctgttttgttttctgctgagcttactgtcggttgggtctag **atcgataagcttgatatcg**  
*EcoRV*

**GAACCTGAATTCTGTGAAAAACCATAATTACGGATCTGGCTTCTGAG**atggaccattgcaaaggacta  
 \*\*\*\*\*  
**aattcctgcagcccggggatccactagttctagagcgcgcgatcgat**atggaccattgcaaaggacta

↗ Exon 4  
 ttgtgttcttctttaatgttggcaatgacgtaatgcctgtgttttgttttatattttag **GGCCAGTCA**  
 \*\*\*\*\*  
 ttgtgttcttctttaatgttggcaatgacgtaatgcctgtgttttgttttatattttag **GGCCAGTCA**

↗ Intron 4  
**CACAAGAACTTGGCAGAGATGCCAGTCCGCCTGTGAAGATCCTGCAGCAGGAGTGCAT**gtgagtgggtgct  
 \*\*\*\*\*  
**CACAAGAACTTGGCAGAGATGCCAGTCCGCCTGTGAAGATCCTGCAGCAGGAGTGCAT**gtgagtgggtgct

↗ mU50  
 ctgttttgttttctgctgagcttactgtcggttgggtctag **TCTATGATGATCCTATCCCGAACCTGAATTC**  
 \*\*\*\*\*  
 ctgttttgttttctgctgagctta**aagcttgatgggtaccgagcgaacgcgtataacttcgtagata**  
↘ Lox P

**CTGTTGAAAAACCATACTTACGGATCTGGCTTCTGAG**atggaccattgcaaaggactattgtgttct...  
 \*\*\*\*\*  
**cattatacgaagttat**ctcgagtcgctcgaattcctgcagcccggtgcaaaggactattgtgttct...
