# Supplementary material for: Generation of a Mouse Model with Down-Regulated U50 snoRNA (SNORD50) Expression and Its Organ-Specific Phenotypic Modulation
Source: PubMed Central journal article supplement (PMC3753356; doi:10.1371/journal.pone.0072105), 2013-08-26

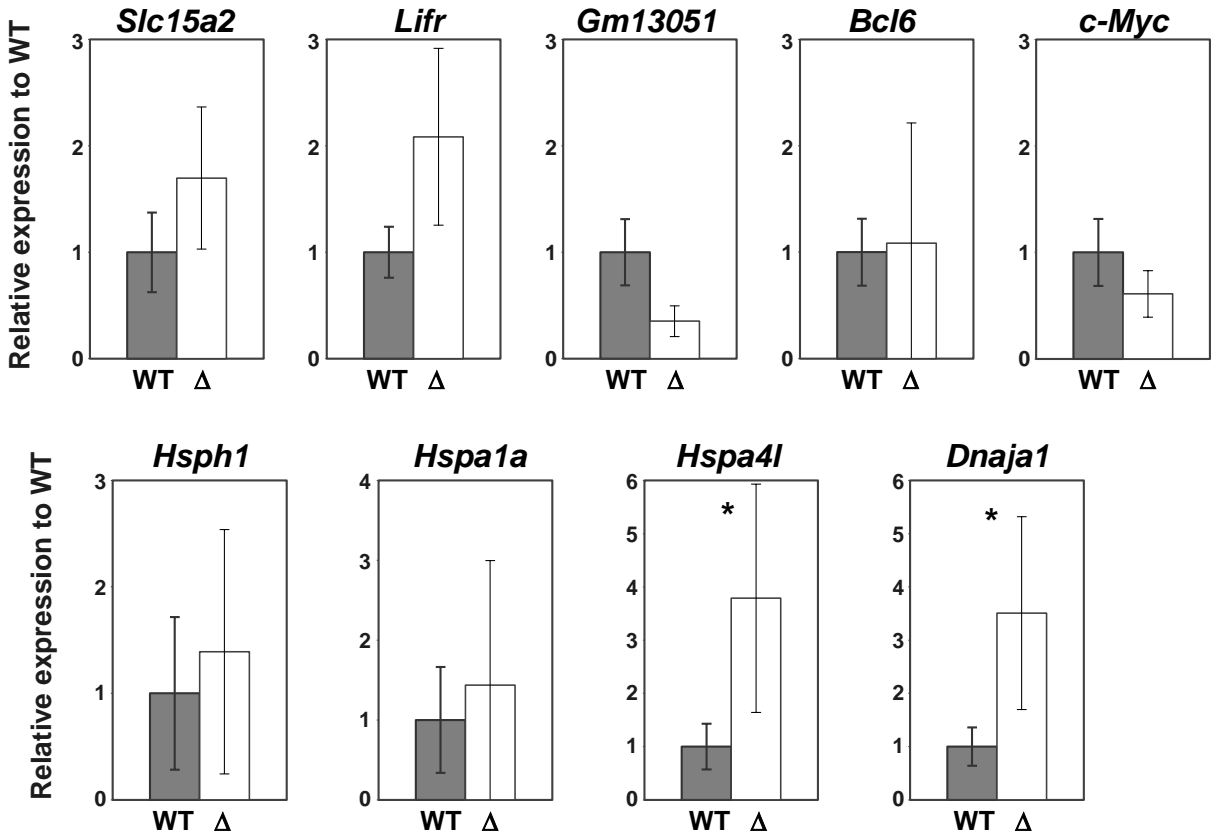

Supplement: pone.0072105.s004.pdf [file pone.0072105.s004.pdf]
