# Supplementary material for: Generation of a Mouse Model with Down-Regulated U50 snoRNA (SNORD50) Expression and Its Organ-Specific Phenotypic Modulation
Source: PubMed Central journal article supplement (PMC3753356; doi:10.1371/journal.pone.0072105), 2013-08-26

**A**

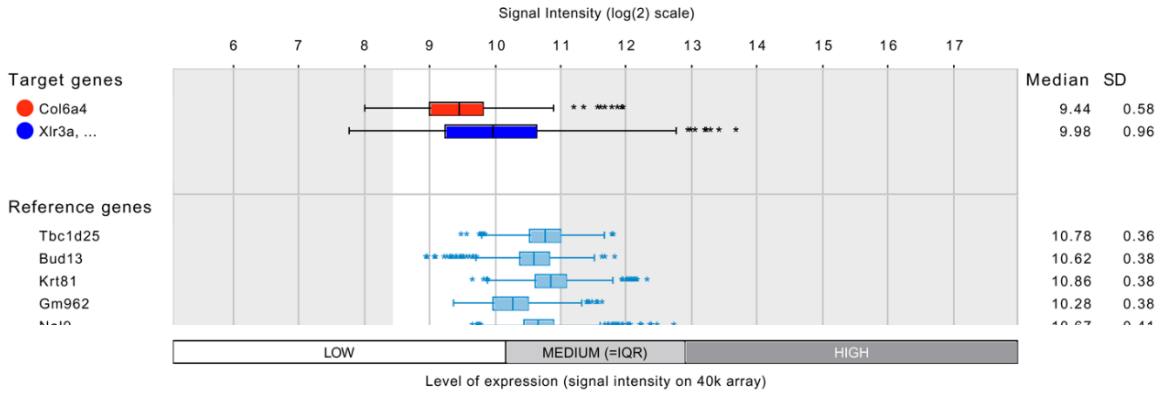

**B**

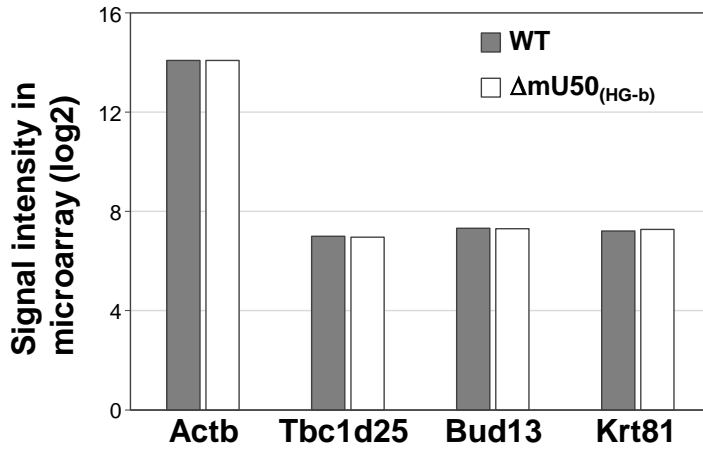

**C**

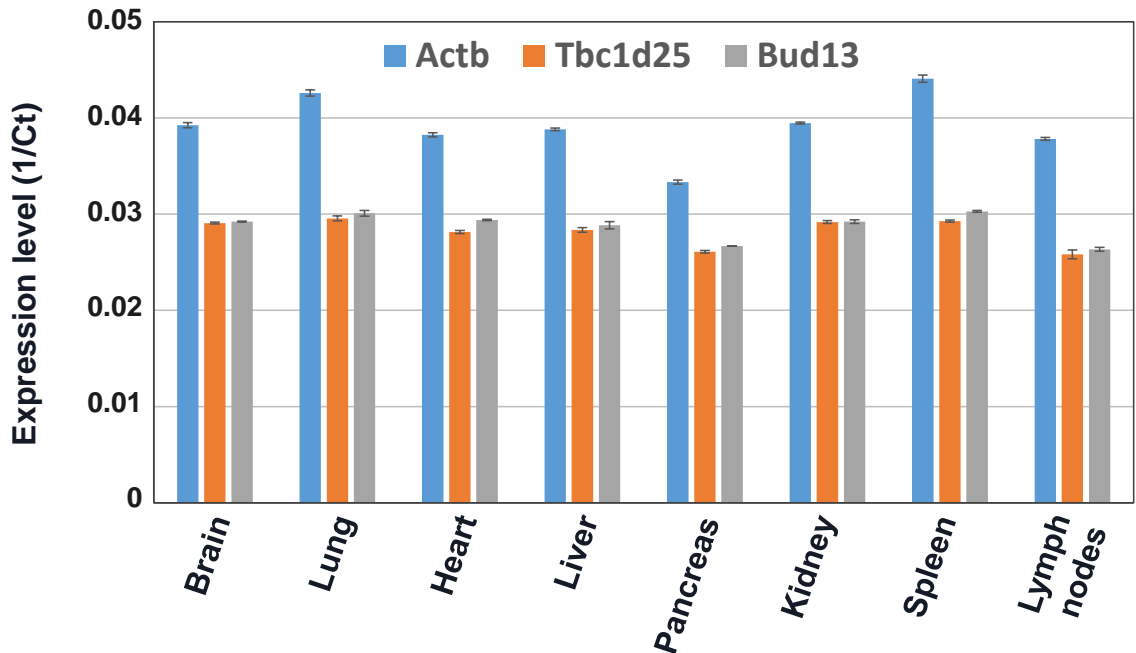

Supplement: pone.0072105.s005.pdf [file pone.0072105.s005.pdf]
